# Supplementary material for: From a bio-based phosphorus-containing epoxy monomer to fully bio-based flame-retardant thermosets
Source: Royal Society of Chemistry journal article supplement (doi:10.1039/c5ra12859e), 2015-01-01

## Supporting information

### From bio-based phosphorus-containing epoxy monomer to fully bio-based flame-retarded thermosets

Raphaël Ménard <sup>a,b</sup>, Claire Negrell <sup>a</sup>, Maxence Fache <sup>a</sup>, Laurent Ferry <sup>b</sup>, Rodolphe Sonnier <sup>b</sup> and Ghislain David<sup>a\*</sup>

<sup>a</sup>Institut Charles Gerhardt, Montpellier, UMR CNRS 5253, Equipe Ingénierie et Architectures Macromoléculaires, Ecole Nationale Supérieure de Chimie de Montpellier, 8 rue de l'école normale, 34296 Montpellier Cedex 5, France.

\*Email Address: ghislain.david@enscm.fr

<sup>b</sup>Ecole des Mines d'Alès, Centre des Matériaux des Mines d'Alès – Pôle Matériaux Polymères Avancés, 6 Avenue de Clavières, 30319 Alès Cedex, France

#### S.I.1 : <sup>1</sup>H-NMR spectrum of the triglycidyl phloroglucinol (P3EP) in DMSO-d<sub>6</sub>

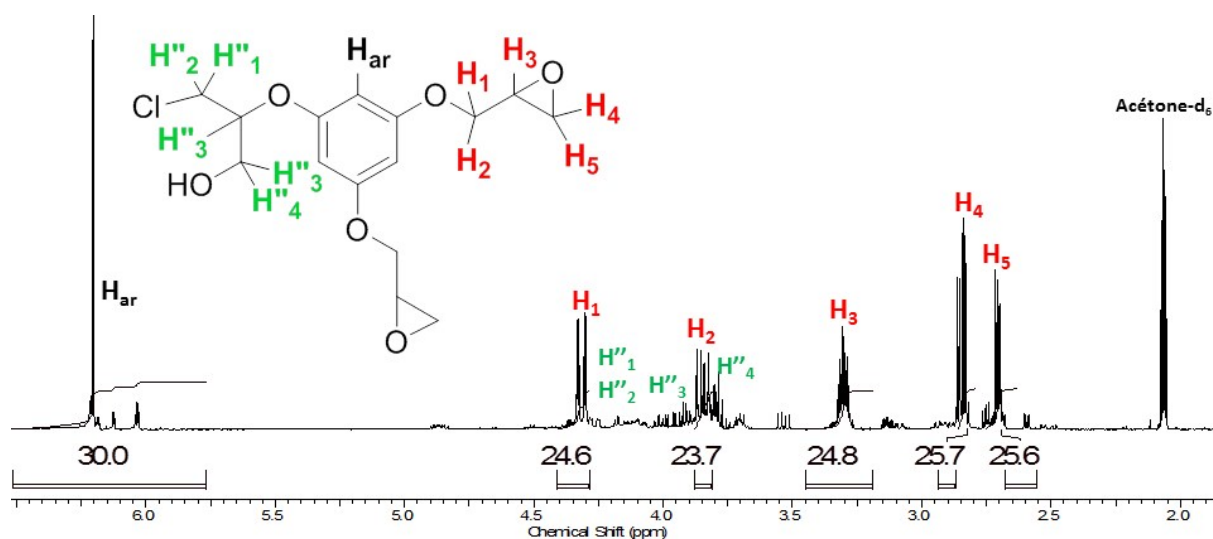

### S.I.2 : DSC curves of all the thermoset prepared

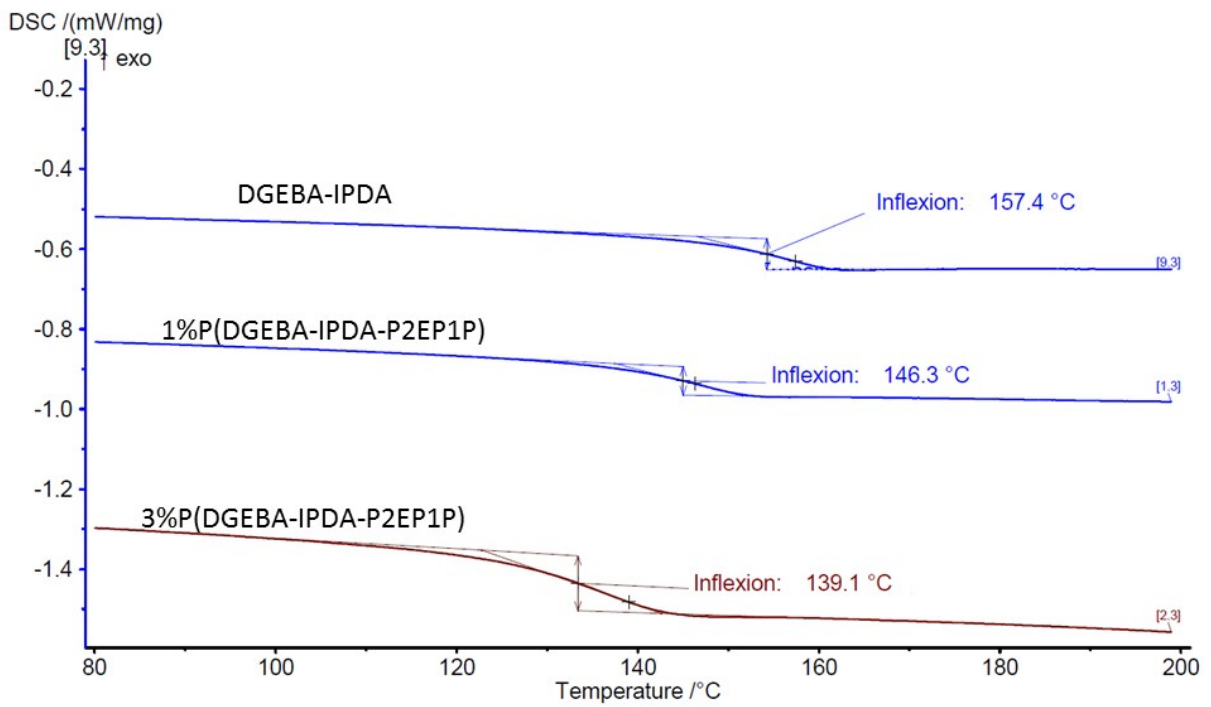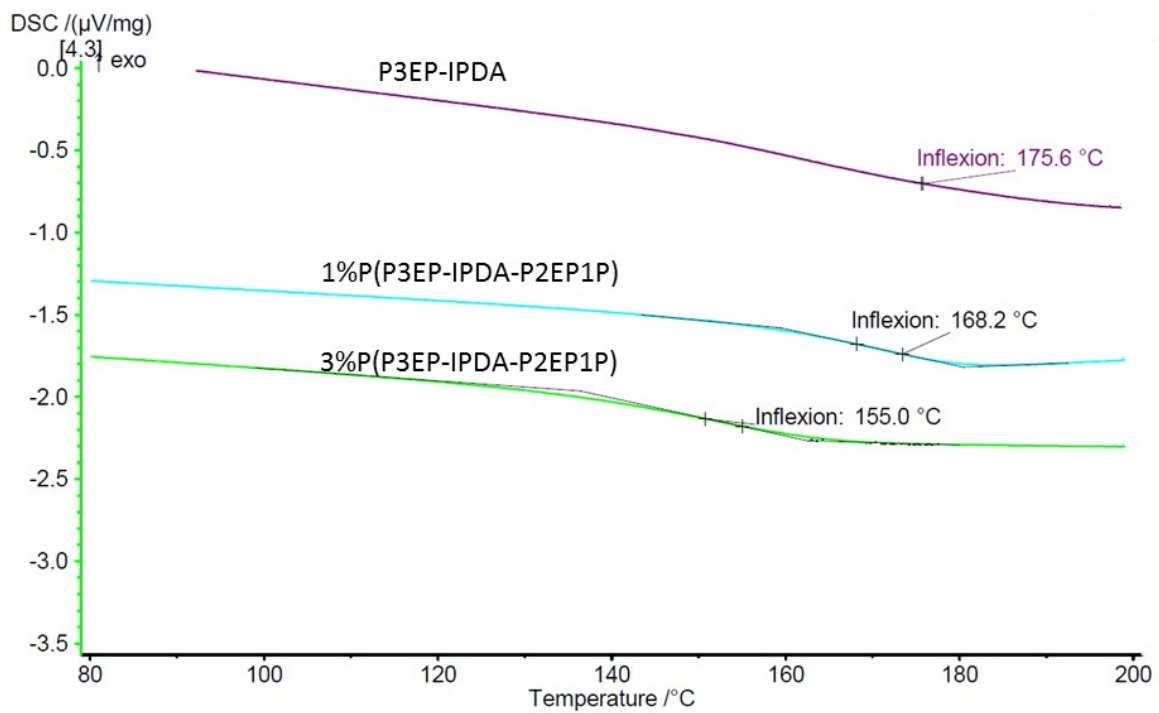

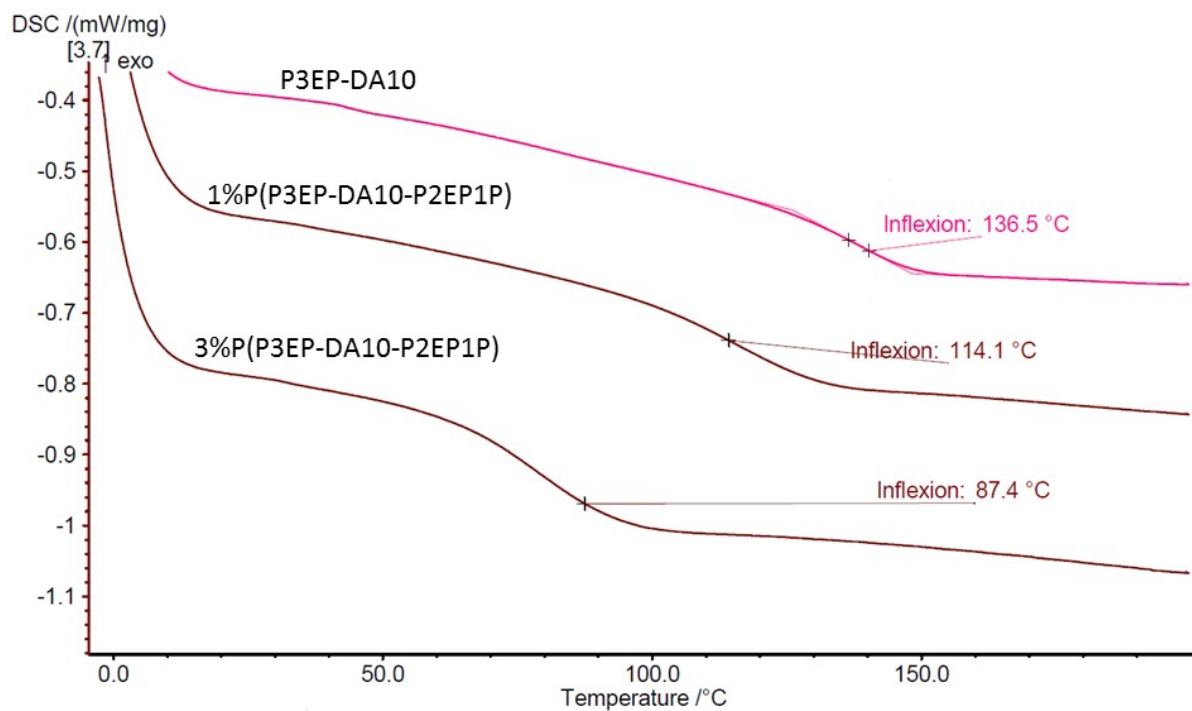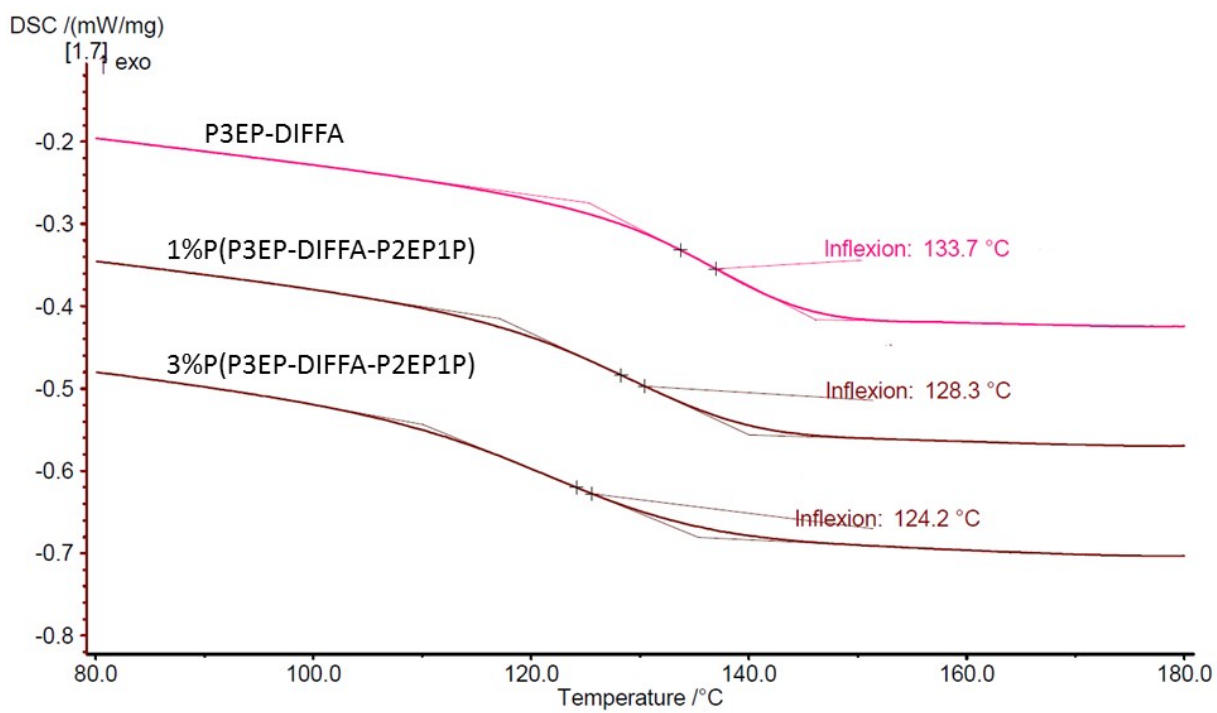

Supplement: c5ra12859e1.pdf [file c5ra12859e1.pdf]
